# Supplementary material
Source: Springer Nature journal article supplement (https://www.springermedizin.de/resource/supplementary/12905_2008_151_MOESM1_ESM.pdf/9519190)

Estradiol in plasma (pg/ml)

40000  
30000  
20000  
10000  
0

10

15

20

25

30

35

Gestational week

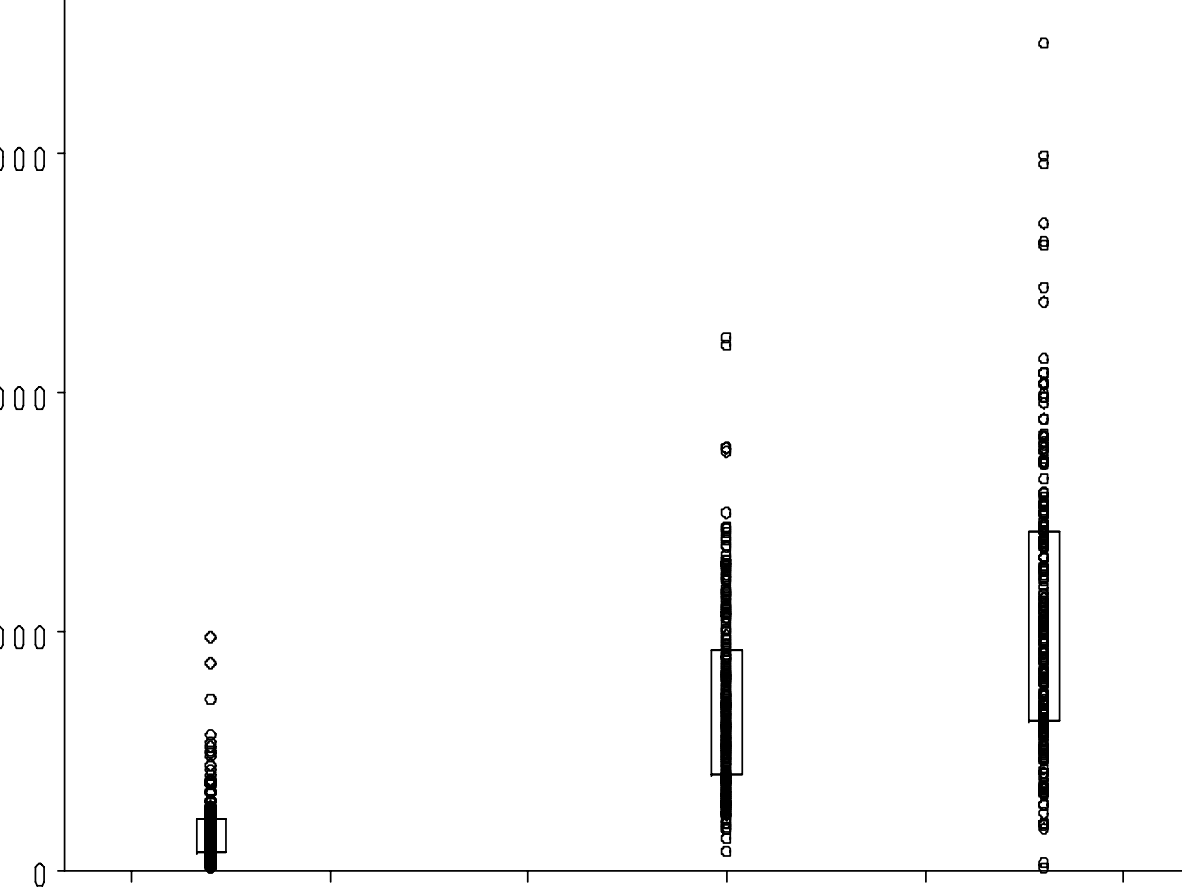

Supplement: MOESM1 [file 9519190]
